# Supplementary material
Source: PubMed Central journal article supplement (PMC2234070)
Supplement: blood_blood-2007-09-101709_1.pdf [file blood_blood-2007-09-101709_1.pdf]

---

|                                                          |                                     |
|----------------------------------------------------------|-------------------------------------|
| <i>Acinetobacter alcaligenes</i>                         | <i>Morganella morganii</i>          |
| <i>Acinetobacter baumannii</i>                           | <i>Moraxella catarrhalis</i>        |
| <i>Acinetobacter calcoaceticus</i> var. <i>anitratus</i> | <i>Moraxella osloensis</i>          |
| <i>Acinetobacter calcoaceticus</i> var. <i>Iwoffii</i>   | <i>Moraxella</i> , NOS              |
| <i>Acinetobacter rursingii</i>                           | <i>Neisseria sicca</i>              |
| <i>Acinetobacter</i> , NOS                               | <i>Neisseria</i> , NOS              |
| <i>Aeromonas caviae</i>                                  | <i>Pantoea agglomerans</i>          |
| <i>Aeromonas hydrophila</i>                              | <i>Proteus mirabilis</i>            |
| <i>Agrobacterium tumefaciens</i>                         | <i>Pseudomonas acidovorans</i>      |
| <i>Alcaligenes</i> , NOS                                 | <i>Pseudomonas aeruginosa</i>       |
| <i>Bacteroides distasonis</i>                            | <i>Pseudomonas cepacia</i>          |
| <i>Burkholderia cepacia</i>                              | <i>Pseudomonas diminuta</i>         |
| <i>Citrobacter freundii</i>                              | <i>Pseudomonas fluorescens</i>      |
| <i>Enterobacter aerogenes</i>                            | <i>Pseudomonas maltophilia</i>      |
| <i>Enterobacter agglomerans</i>                          | <i>Pseudomonas orzihabitans</i>     |
| <i>Enterobacter asburiae</i>                             | <i>Pseudomonas paucimobilis</i>     |
| <i>Enterobacter cloacae</i>                              | <i>Pseudomonas putida</i>           |
| <i>Enterobacter</i> , NOS                                | <i>Pseudomonas stutzeri</i>         |
| <i>Escherichia coli</i>                                  | <i>Pseudomonas verisularis</i>      |
| <i>Kebsiella oxytoca</i>                                 | <i>Pseudomonas</i> , NOS            |
| <i>Kebsiella ozenae</i>                                  | <i>Ralstonia pickettii</i>          |
| <i>Kebsiella pneumoniae</i>                              | <i>Serratia liquefaciens</i>        |
| <i>Kebsiella</i> , NOS                                   | <i>Serratia marcescens</i>          |
| <i>Leptotrichia</i> , NOS                                | <i>Serratia</i> , NOS               |
|                                                          | <i>Stenotrophomonas maltophilia</i> |

---
