# Supplementary material
Source: PubMed Central journal article supplement (PMC2234070)
Supplement: blood_blood-2007-09-101709_2.pdf [file blood_blood-2007-09-101709_2.pdf]

| Clinical Variables               | Gram-negative bacteremia |                  |             | Death            |                  |             |
|----------------------------------|--------------------------|------------------|-------------|------------------|------------------|-------------|
|                                  | No<br>(N=218)            | Yes<br>(N=32)    | P-<br>value | No<br>(N=205)    | Yes<br>(N=29)    | P-<br>value |
| <b>Age (years)</b>               | 49.72 ±<br>13.36         | 50.05 ±<br>13.75 | 0.897       | 48.98 ±<br>13.13 | 55.29 ±<br>14.11 | 0.017       |
| <b>Sex match (P:D)</b>           |                          |                  |             |                  |                  |             |
| <b>Male:male</b>                 | 76 (35)                  | 10 (31)          | 0.837       | 63 (31)          | 7 (24)           | 0.519       |
| <b>Male:female</b>               | 64 (29)                  | 8 (25)           |             | 59 (29)          | 13 (45)          |             |
| <b>Female:male</b>               | 42 (19)                  | 7 (22)           |             | 43 (21)          | 6 (21)           |             |
| <b>Female:female</b>             | 36 (17)                  | 7 (22)           |             | 40 (19)          | 3 (10)           |             |
| <b>Disease risk</b>              |                          |                  |             |                  |                  |             |
| <b>Low</b>                       | 16 (8)                   | 2 (6)            | 0.942       | 16 (8)           | 2 (7)            | 0.157       |
| <b>Moderate</b>                  | 101 (50)                 | 16 (50)          |             | 107 (52)         | 10 (34)          |             |
| <b>High</b>                      | 85 (42)                  | 14 (44)          |             | 82 (40)          | 17 (59)          |             |
| <b>Donor type</b>                |                          |                  |             |                  |                  |             |
| <b>Related</b>                   | 80 (40)                  | 15 (47)          | 0.693       | 87 (42)          | 8 (28)           | 0.281       |
| <b>Unrelated</b>                 | 121 (60)                 | 17 (53)          |             | 1 (<1)           | 0 (0)            |             |
| <b>Iso</b>                       | 1 (<1)                   | 0 (0)            |             | 117 (57)         | 21 (72)          |             |
| <b>Conditioning regimen</b>      |                          |                  |             |                  |                  |             |
| <b>Nonmyeloablative</b>          | 90 (45)                  | 19 (59)          | 0.278       | 93 (45)          | 16 (55)          | 0.449       |
| <b>Myeloablative</b>             |                          |                  |             |                  |                  |             |
| <b>No TBI</b>                    | 75 (37)                  | 8 (25)           |             | 39 (19)          | 3 (10)           |             |
| <b>Yes TBI</b>                   | 37 (18)                  | 5 (16)           | 73 (36)     | 10 (35)          |                  |             |
| <b>Stem cell source</b>          |                          |                  |             |                  |                  |             |
| <b>Bone marrow</b>               | 24 (12)                  | 7 (22)           | 0.189       | 27 (13)          | 4 (14)           | 0.600       |
| <b>PBSC</b>                      | 171 (85)                 | 25 (78)          |             | 171 (83)         | 25 (86)          |             |
| <b>Cord</b>                      | 7 (3)                    | 0                |             | 7 (4)            | 7 (3)            |             |
| <b>CMV serostatus (P:D)</b>      |                          |                  |             |                  |                  |             |
| <b>Negative:negative</b>         | 86 (39)                  | 11 (34)          | 0.353       | 71 (35)          | 10 (34)          | 0.663       |
| <b>Negative:positive</b>         | 19 (9)                   | 6 (19)           |             | 20 (10)          | 5 (17)           |             |
| <b>Positive: negative</b>        | 66 (30)                  | 8 (25)           |             | 66 (32)          | 8 (28)           |             |
| <b>Positive:positive</b>         | 47 (22)                  | 7 (22)           |             | 48 (23)          | 6 (21)           |             |
| <b>Pretransplant neutropenia</b> |                          |                  |             |                  |                  |             |
| <b>No</b>                        | 186 (85)                 | 25 (78)          | 0.295       | 174 (85)         | 21 (72)          | 0.092       |
| <b>Yes</b>                       | 32 (15)                  | 7 (22)           |             | 31 (15)          | 8 (28)           |             |

P=patient; D=donor; TBI=total body irradiation ≥1200 Gy; PBSC=peripheral blood stem cell
